# Supplementary material
Source: MDPI journal article supplement (https://www.mdpi.com/1424-8247/16/2/227)
Supplement: s1 [file s1]

**Table S1.** Representative summary of the preclinical development for candidate HDACi-derived glioma therapy.

|                                                                                     | Regimen                        | Year                                                                                                  | Main outcome and findings                                                                                                                                                                               | Ref                                                                  |
|-------------------------------------------------------------------------------------|--------------------------------|-------------------------------------------------------------------------------------------------------|---------------------------------------------------------------------------------------------------------------------------------------------------------------------------------------------------------|----------------------------------------------------------------------|
| Vorinostat<br>(SAHA, Zolinza,<br>MK0683)<br><i>Pan-HDACi</i>                        | /                              | 2005                                                                                                  | Growth inhibition. Single intra-tumoral injection doubled the survival time of a rat orthotopic glioma model                                                                                            | [1]                                                                  |
|                                                                                     | /                              | 2007                                                                                                  | Local delivery inhibited intracranial growth in vitro and in vivo                                                                                                                                       | [2]                                                                  |
|                                                                                     | /                              | 2007                                                                                                  | Inhibited GB growth in vitro and in vivo. Suggested BBB crossing                                                                                                                                        | [3]                                                                  |
|                                                                                     | VAN                            | 2009                                                                                                  | Treatment enhanced the antiproliferative effect of VAN by inhibition of MAPK, Akt, and other downstream effectors                                                                                       | [4]                                                                  |
|                                                                                     | /                              | 2010                                                                                                  | Affected glioma cell proliferation, migration, and invasion (2D and 3D)                                                                                                                                 | [5]                                                                  |
|                                                                                     | /                              | 2011                                                                                                  | Caused GSC disruption and decreased expression of EZH2 and CD133                                                                                                                                        | [6]                                                                  |
|                                                                                     | /                              | 2011                                                                                                  | Cell cycle protein modulation, activation of the G <sub>2</sub> /M checkpoint and induction of apoptosis                                                                                                | [7]                                                                  |
|                                                                                     | LSD1 inhibitor                 | 2011                                                                                                  | LSD1 and HDACs cooperate to regulate key apoptotic pathways in GB                                                                                                                                       | [8]                                                                  |
|                                                                                     | /                              | 2013                                                                                                  | Tumor growth slowdown and autophagy in GB stem cells                                                                                                                                                    | [9]                                                                  |
|                                                                                     | Bortezomib                     | 2013                                                                                                  | Combination therapy significantly enhanced apoptosis                                                                                                                                                    | [10]                                                                 |
|                                                                                     | Obatoclastax/RT                | 2014                                                                                                  | Bcl-2 inhibitor obatoclastax overcomes resistance and radiosensitizes                                                                                                                                   | [11]                                                                 |
|                                                                                     | /                              | 2014                                                                                                  | Causes glioma cells to enter into mitosis before DNA damage could be repaired; formation of an aberrant mitotic spindle that results in glioma cell death through mitotic catastrophe-induced apoptosis | [12]                                                                 |
|                                                                                     | HIRT                           | 2015                                                                                                  | Suggests a vital role of HDACs in the DDR and support the role of SAHA for GB treatment in combination with heavy ion therapy                                                                           | [13]                                                                 |
|                                                                                     | RT                             | 2015                                                                                                  | HDACi treatment 24 and 48-hours pre-RT caused best efficacy. Responses associated with pChek2 and Bcl-XL                                                                                                | [14]                                                                 |
|                                                                                     | OLA                            | 2016                                                                                                  | Combination treatment enhanced inhibition of GB survival, induces apoptosis and impairs cell cycle progression                                                                                          | [15]                                                                 |
|                                                                                     | /                              | 2017                                                                                                  | Suppressed hypoxia signaling by modulating nuclear translocation of HIF-1 $\alpha$                                                                                                                      | [16]                                                                 |
|                                                                                     | Chloroquine                    | 2018<br>2019                                                                                          | Autophagy inhibition potentiates SAHA-mediated apoptosis in GB cells                                                                                                                                    | [17,18]                                                              |
|                                                                                     | MC1568                         | 2019                                                                                                  | Decreased tube formation of U87MG cells and patient-derived GB CSCs                                                                                                                                     | [19]                                                                 |
|                                                                                     | 4HPR                           | 2020                                                                                                  | Combination treatment significantly reduced cell viability of rat C6 and human T98G GB cells                                                                                                            | [20]                                                                 |
|                                                                                     | /                              | 2021                                                                                                  | Decreased EB1 expression in GB cells, affected microtubule dynamics, cell survival and migration                                                                                                        | [21]                                                                 |
|                                                                                     | /                              | 2022                                                                                                  | Impairing GB cell viability, proliferation, cell motility and migration                                                                                                                                 | [22]                                                                 |
|                                                                                     | EDO-S101*<br><i>Pan HDACi</i>  | /                                                                                                     | 2018                                                                                                                                                                                                    | Promising therapeutic activity against GB causing prolonged survival |
| Romidepsin<br>(Istodax, FK228,<br>FR901228,<br>depsipeptide)<br><i>HDAC class I</i> | /                              | 2004                                                                                                  | Inhibited glioma cell proliferation and apoptosis was induced. In vivo, intracranial growth of transplanted GB m3-cells was inhibited                                                                   | [24]                                                                 |
|                                                                                     | Gamitrinib<br>(TRAP1)          | 2020                                                                                                  | Synergistic growth reduction of PDX GB cells                                                                                                                                                            | [25]                                                                 |
|                                                                                     | Imipridones                    | 2022                                                                                                  | Induction of synthetic lethality and increased survival of a GB PDX model                                                                                                                               | [26]                                                                 |
| Belinostat<br>(PXD101,<br>Beleodaq)<br><i>Pan-HDACi</i>                             | /                              | 2016                                                                                                  | Variable responses in different GB cell lines. Up-regulation of p21 mRNA expression                                                                                                                     | [27]                                                                 |
|                                                                                     | /                              | 2019                                                                                                  | Treatment reduced tumor volume in an orthotopic rat glioma model                                                                                                                                        | [28]                                                                 |
| Panobinostat<br>(LBH589)<br><i>HDAC class III</i>                                   | RT                             | 2015                                                                                                  | Sensitized 45% of cultures. HDACi treatment 24/48-hours pre-RT resulted in the best efficacy. Responses associated with pChek2 and Bcl-XL                                                               | [14]                                                                 |
|                                                                                     | Obatoclastax/RT                | 2014                                                                                                  | Bcl-2 inhibitor obatoclastax overcomes resistance and radiosensitizes                                                                                                                                   | [11]                                                                 |
|                                                                                     | Bortezomib                     | 2008                                                                                                  | Synergistic apoptosis mediated by mitochondrial Bax translocation                                                                                                                                       | [29]                                                                 |
|                                                                                     | Oncolytic Virus<br>Delta24-RGD | 2015                                                                                                  | Synergism in 50% of GSC. Toxicity to human astrocytes remained limited                                                                                                                                  | [30]                                                                 |
|                                                                                     | /                              | 2017                                                                                                  | CED of loaded pluronic nano-micelles prolongs survival in a GB rat model                                                                                                                                | [31]                                                                 |
|                                                                                     | /                              | 2017                                                                                                  | Inhibits GB growth and angiogenesis through suppression of HIF-1 $\alpha$                                                                                                                               | [32]                                                                 |
|                                                                                     | Bromodomain<br>inhibitor       | 2018                                                                                                  | Synergistical efficacy: inhibited cell viability and induced apoptosis of GB cells                                                                                                                      | [33]                                                                 |
|                                                                                     | OTX015/Sorafenib               | 2018                                                                                                  | Triple combination therapy caused significantly extended host survival                                                                                                                                  | [34]                                                                 |
| BEZ235                                                                              | 2019                           | Synergistically inhibited cell viability; markedly inhibited cell proliferation and induced apoptosis | [35]                                                                                                                                                                                                    |                                                                      |

|                                                          |                     |                                                                                                                                                 |                                                                                                                                                                                                      |      |
|----------------------------------------------------------|---------------------|-------------------------------------------------------------------------------------------------------------------------------------------------|------------------------------------------------------------------------------------------------------------------------------------------------------------------------------------------------------|------|
|                                                          | Gamitrinib (TRAP1)  | 2020                                                                                                                                            | Combination induced synthetic lethality in PDX GB cells                                                                                                                                              | [25] |
|                                                          | Etomoxir            | 2020                                                                                                                                            | Combination treatment demonstrated significantly prolonged survival of an PDX GB mice model                                                                                                          | [36] |
|                                                          | DZ-Nep /TMZ         | 2020                                                                                                                                            | Highest synergistic combination: DZ-Nep + panobinostat                                                                                                                                               | [37] |
|                                                          | DZ-Nep/APR-246/ TMZ | 2021                                                                                                                                            | APR-246 acts in an additive manner, reducing clonogenicity and inducing apoptosis in GB cells independently of p53 status                                                                            | [38] |
|                                                          | TMZ/LW#             | 2021                                                                                                                                            | Triple combination therapy showed a cytotoxic effect against glioma cells (no immunogenic cell death seen)                                                                                           | [39] |
|                                                          | LY500307            | 2021                                                                                                                                            | Combined treatment reduced cell viability, invasion, colony formation, enhanced apoptosis and enhanced survival of tumor-bearing mice. Could overcome the suppression of ER $\beta$ expression       | [40] |
|                                                          | Imipridones         | 2022                                                                                                                                            | Induction of synthetic lethality and increased survival of a GB PDX mice model                                                                                                                       | [26] |
| Valproic acid (VPA, valproate, Depakene)<br>HDAC class I | /                   | 1998                                                                                                                                            | Restricted proliferation in the mid-G1 phase of the cell cycle and altered the prevalence and/or glycosylation state of cell surface glycoproteins                                                   | [41] |
|                                                          | /                   | 1998                                                                                                                                            | Inhibited proliferation and changed expression of CD44 and CD56 of malignant glioma cells in vitro                                                                                                   | [42] |
|                                                          | RT                  | 2005                                                                                                                                            | Enhanced radiosensitivity of SF539 / U251 cell lines and U251 mice xenograft                                                                                                                         | [43] |
|                                                          | Hydralazine&        | 2006                                                                                                                                            | VPA monotherapy led to 80% growth inhibition in D54 glioma cells, potentiated by hydralazine                                                                                                         | [44] |
|                                                          | Etoposide           | 2007                                                                                                                                            | VPA sensitized glioma cells to etoposide (induced differentiation and up-regulation of p21/WAF1 expression and both isoforms of topoisomerase-II)                                                    | [45] |
|                                                          | /                   | 2010                                                                                                                                            | Induced cell growth inhibition and apoptotic activity in U87MG GB cells. Decreased MMP2 and MMP9 activity and enhanced expression of TIMP1                                                           | [46] |
|                                                          | /                   | 2014                                                                                                                                            | Caused glioma cell entry into mitosis before DNA damage could be repaired, formation of an aberrant mitotic spindle that resulted in glioma cell death through mitotic catastrophe-induced apoptosis | [12] |
|                                                          | RT                  | 2015                                                                                                                                            | VPA sensitized 40% of cultures. Incubation 24 and 48-hours pre-RT resulted in the best efficacy                                                                                                      | [14] |
|                                                          | /                   | 2015                                                                                                                                            | Significantly reduced the proliferation rate and expression of the stem cell markers of GB-derived stem cells, indicating differentiation of the cells                                               | [47] |
|                                                          | /                   | 2016                                                                                                                                            | Promoted apoptosis and inhibited Glycogen Synthase Kinase-3 $\beta$ through ERK/Akt signaling                                                                                                        | [48] |
|                                                          | Fluvastatin         | 2017                                                                                                                                            | Synergistic apoptosis induction                                                                                                                                                                      | [49] |
|                                                          | /                   | 2017                                                                                                                                            | Inhibited GB cell growth via paraoxonase 2 expression                                                                                                                                                | [50] |
|                                                          | Sulfasalazine       | 2018                                                                                                                                            | Combination therapy: substantial effect on GB cell's death related to an intracellular oxidative response imbalance                                                                                  | [51] |
|                                                          | /                   | 2018                                                                                                                                            | Inhibited proliferation and reduced invasiveness in GSC through Wnt/ $\beta$ -catenin signalling activation                                                                                          | [52] |
|                                                          | TMZ                 | 2019                                                                                                                                            | VPA induced amphiregulin secretion confers resistance to TMZ                                                                                                                                         | [53] |
| /                                                        | 2019                | VPA increased the expression levels of acetylated histones H3 and H4 in vitro (could not be confirmed in clinical tumor samples of GB patients) | [54]                                                                                                                                                                                                 |      |
| /                                                        | 2022                | Induced cell apoptosis through extrinsic, intrinsic, and JAK/STAT pathways                                                                      | [55]                                                                                                                                                                                                 |      |
| AN-446<br>VPA prodrug                                    | /                   | 2018                                                                                                                                            | More potent than VPA. Superior in inducing DNA damage in cancer cells, while in normal astrocytes and cardiomyoblasts AN446 was the least toxic                                                      | [56] |
| Trichostatin A (TSA)<br>HDAC 7,8                         | /                   | 2001                                                                                                                                            | Induced apoptosis through an increase in Bad protein in human glioma cells                                                                                                                           | [57] |
|                                                          | /                   | 2005                                                                                                                                            | Inhibition of cell growth, cell cycle arrest and apoptosis induction                                                                                                                                 | [58] |
|                                                          | 2DDG                | 2006                                                                                                                                            | Combined therapy induced strong apoptosis in brain cancer cells (non p53-dependent)                                                                                                                  | [59] |
|                                                          | /                   | 2008                                                                                                                                            | Induced apoptosis and cell type-specific differentiation                                                                                                                                             | [60] |
|                                                          | MG132               | 2008                                                                                                                                            | Synergism of apoptosis induction in U251 glioma cells upon combined treatment                                                                                                                        | [29] |
|                                                          | /                   | 2009                                                                                                                                            | NECL1 is a tumor suppressor. Loss of it may be caused by histone deacetylation (which can be counteracted by TSA)                                                                                    | [61] |
|                                                          | /                   | 2010                                                                                                                                            | Expression of DKK1, SFRP1 and WIF1 (potent inhibitors of Wnt signal transduction pathways) are decreased in GB, but was restored by TSA                                                              | [62] |
|                                                          | /                   | 2011                                                                                                                                            | TSA activates the p38MAPK-p53 cascade, which leads to Bax expression, decreased survival in C6 glioma cells                                                                                          | [63] |
| /                                                        | 2013                | Promotes apoptosis, as well as augments anti-GB innate immune responses. In vivo, tumor growth of GB mice xenografts was delayed                | [64]                                                                                                                                                                                                 |      |

|                                                       |                |      |                                                                                                                                                                                     |      |
|-------------------------------------------------------|----------------|------|-------------------------------------------------------------------------------------------------------------------------------------------------------------------------------------|------|
|                                                       | /              | 2014 | TSA can inhibit proliferation, survival, tumor sphere formation, and promote differentiation of U87MG GB cells                                                                      | [65] |
|                                                       | /              | 2015 | Significantly reduced proliferation rate and expression of the stem cell markers of GB-derived stem cells, indicating differentiation of the cells                                  | [47] |
|                                                       | CCNU           | 2017 | Kills GB cells more efficiently than either of its monotherapies                                                                                                                    | [66] |
|                                                       | /              | 2019 | Decreased tube formation of U87MG and patient-derived GB CSCs                                                                                                                       | [19] |
|                                                       | /              | 2022 | Impairing GB cell viability and proliferation, cell motility/migration                                                                                                              | [22] |
|                                                       | DZNep/BIX01294 | 2022 | In combinations they exhibited a synergistic effect on U87MG GB cells                                                                                                               | [67] |
| Entinostat<br>(MS275)<br>Class I and IV               | RT             | 2004 | Increased radiosensitivity ( $\gamma$ H2AX foci)                                                                                                                                    | [68] |
|                                                       | /              | 2006 | Reduced growth of glioma cell lines, mediated by cell cycle arrest and apoptosis. In vivo, propensity to pass the BBB                                                               | [69] |
|                                                       | /              | 2009 | Induced GB-derived stem-like cells to differentiate, become apoptotic and not grow as neurospheres / initiate tumor xenografts                                                      | [70] |
|                                                       | DOX            | 2011 | Chemotherapy--induced apoptosis increased                                                                                                                                           | [71] |
|                                                       | RT             | 2015 | Radiosensitization                                                                                                                                                                  | [14] |
|                                                       | /              | 2019 | Decreased tube formation of U87MG and patient-derived GB CSCs                                                                                                                       | [19] |
|                                                       | MEKi           | 2022 | Combination: more effective at reducing the GB stem-like cell markers                                                                                                               | [72] |
| MC1568<br>Class IIa                                   | /              | 2019 | Decreased tube formation of U87MG and patient-derived GB CSCs                                                                                                                       | [19] |
| MPT0B291<br>HDAC 6,2                                  | /              | 2020 | Reduced cell viability, increased cell death and G1-phase cell cycle arrest. In vivo, therapy reduced tumor volume                                                                  | [73] |
|                                                       | /              | 2021 | More effective in blocking homologous recombination repair in GB cells. Reduced the growth of both TMZ-sensitive and resistant cells and prolonged survival in GB mouse model       | [74] |
| Quisinostat<br>(JNJ-26481585)<br>HDAC 1,6,9           | /              | 2014 | Most consistent in vivo activity signals observed in GB and T-cell acute lymphoblastic leukemia xenografts                                                                          | [75] |
|                                                       | AuNP           | 2021 | Injectable hydrogel: successfully inhibited in vivo tumor growth                                                                                                                    | [76] |
| CKD5<br>pan HDACi                                     | /              | 2017 | Cytotoxic effects > SAHA and TSA, induced apoptosis, anti-proliferative activity and cell cycle arrest at G2/M-phase. Reduced tumor volume and prolonged the survival in vivo > TSA | [77] |
| Sahaquine<br>HDAC6                                    | TMZ            | 2018 | Reduces the viability and invasiveness of GB tumoroids, as well as brain tumor stem cells. These effects are augmented upon combined therapy                                        | [78] |
| Abexinostat<br>(PCI-24781,<br>CRA-024781)<br>HDAC 1,2 | LSD1 inhibitor | 2011 | LSD1 and HDACs cooperate to regulate key apoptotic pathways in GB                                                                                                                   | [8]  |
|                                                       | /              | 2014 | Attenuated cell proliferation / increased apoptosis by down-regulating EZH2, which promoted c-myc-driven apoptosis by suppressing PI3K/Akt/mTOR                                     | [79] |
|                                                       | TMZ            | 2021 | Works synergistically with TMZ                                                                                                                                                      | [80] |
| 4-phenylbutyrate<br>(4-PBA)<br>pan HDACi              | /              | 2004 | 4-BPA results in inhibition of cell growth. Modulates glial fibrillary acidic protein and connexin 43 expression, enhances gap-junction communication                               | [81] |
|                                                       | /              | 2008 | GB cell lines: induced apoptosis in a dose- and time-dependent manner. All cell lines displayed unique phenotypic responses and differentiation patterns                            | [60] |
|                                                       | GEF/VAN        | 2011 | Combined: enhanced cell killing and reduced clonogenic survival                                                                                                                     | [82] |
|                                                       | /              | 2016 | Inhibited cell growth and proliferation                                                                                                                                             | [83] |
| Sodium Butyrate<br>(SB)                               | /              | 2001 | Intratumoral infusion prolonged the survival of rats with intracerebral C6 tumors without detectable toxicity                                                                       | [84] |
|                                                       | /              | 2001 | Induce apoptosis through an increase in Bad protein in human glioma cells                                                                                                           | [57] |
|                                                       | 2DDG           | 2008 | Combination therapy: apoptosis in brain cancer cells (p53-independent). HDACi upregulate p21, which is blocked by concomitant 2DDG                                                  | [59] |
|                                                       | /              | 2018 | Induced senescence and inhibits the invasiveness of GB cells                                                                                                                        | [85] |
|                                                       | Quercetin      | 2019 | Inhibited protective autophagy to enhance apoptosis in GB cells                                                                                                                     | [86] |
|                                                       | Curcuminoids   | 2021 | Synergistically reduced the viability of GB cells inducing apoptosis and cell cycle arrest. Restored Wnt/ $\beta$ -catenin pathway antagonists gene expression                      | [87] |
| Tubastatin A<br>HDAC6                                 | 2-DG analogs   | 2021 | Synergistic cytotoxic effects in GB U87MG and U-251 cells                                                                                                                           | [88] |
|                                                       | Celecoxib      | 2017 | Synergistic antitumor effects in CAL 27 and SACC-83 cells, mediated by activating the PTEN/AKT signaling pathway                                                                    | [89] |
|                                                       | /              | 2019 | Increased levels of DNA mismatch repair proteins MSH2 and MSH6 in TMZ-resistant GB cells. Decreased MGMT expression in TMZ-resistant GB cells                                       | [90] |
|                                                       | TMZ            | 2019 | Enhanced TMZ-induced apoptosis + reversed malignant phenotype of GB cells                                                                                                           | [91] |
|                                                       | /              | 2020 | Higher target specificity and antitumor activity compared to vorinostat                                                                                                             | [92] |
| Tubacin<br>HDAC6                                      | /              | 2018 | Suppressed glioma cell growth and drug resistance by autophagic suppression                                                                                                         | [93] |
| Dacinostat                                            | MG132%         | 2008 | Combined: synergism of apoptosis induction in U251 glioma cells                                                                                                                     | [29] |

|                                    |                     |      |                                                                                                                                                                   |       |
|------------------------------------|---------------------|------|-------------------------------------------------------------------------------------------------------------------------------------------------------------------|-------|
| (LAQ824)                           | 2DDG                | 2008 | Combined: induced strong apoptosis in brain cancer cells in a p53-independent manner                                                                              | [59]  |
| Ricolinostat (ACY-1215)<br>HDAC6   | /                   | 2015 | U87MG cell growth was significantly inhibited. HDAC6 increased GB growth through attenuating transforming growth factor $\beta$ (TGF $\beta$ ) receptor signaling | [94]  |
|                                    | /                   | 2019 | Increased levels of DNA mismatch repair proteins MSH2 and MSH6 in TMZ-resistant GB cells. Decreased MGMT expression in TMZ-resistant GB cells                     | [90]  |
|                                    | /                   | 2020 | Decreased JNK phosphorylation, preceding its suppression of glioma cell growth, resulting from suppression of MAPK kinase 7                                       | [95]  |
| CAY10603<br>HDAC6                  | /                   | 2020 | MAPK kinase 7 expression and JNK/c-Jun activities were suppressed in U87MG xenograft mice                                                                         | [95]  |
|                                    | /                   | 2019 | Increased levels of DNA mismatch repair proteins MSH2 and MSH6 in TMZ-resistant GB cells. Decreased MGMT expression in TMZ-resistant GB cells                     | [90]  |
| CUDC101<br>pan HDACi               | Erlotinib           | 2016 | Inhibited proliferation of erlotinib-resistant GB cells, partially restored their sensitivity to erlotinib                                                        | [96]  |
| A452<br>HDAC6                      | /                   | 2019 | Increased levels of DNA mismatch repair proteins MSH2 and MSH6 in TMZ-resistant GB cells. Decreased MGMT expression in TMZ-resistant GB cells                     | [90]  |
| MC2129<br>HDAC Class I/IIb         | /                   | 2019 | Stronger cytotoxic and antiproliferative effect compared to SAHA (cell cycle arrest in the G2/M-phase)                                                            | [97]  |
| Mocetinostat (MGCD0103)<br>HDAC1/2 | /                   |      |                                                                                                                                                                   |       |
| MC1746<br>HDAC Class I/IIb         | /                   | 2019 | Antiproliferative effects shown in U87MG glioma cells                                                                                                             | [97]  |
| Scriptaid                          | OVT                 | 2015 | Synergism in 50% of the patient-derived GSC                                                                                                                       | [30]  |
|                                    | RT                  | 2015 | Sensitized 40% of the cultures. Incubation 24 an 48-hours pre-RT resulted in the best efficacy of combination treatment                                           | [14]  |
|                                    | /                   | 2010 | Induction of apoptosis and reduction of glioma cell proliferation through JNK activation and reduction of telomerase activity                                     | [98]  |
| PCI34051<br>HDAC8                  | /                   | 2008 | No cytotoxicity to U87MG glioma cells. IC50 = 17 $\mu$ M                                                                                                          | [99]  |
| Givinostat (ITF2357)<br>pan HDACi  | /                   | 2019 | Reverted transformed phenotype and counteracted stemness in GB (in vitro and in vivo). Efficiently passed the BBB in mice                                         | [100] |
|                                    | Autophagy inhibitor | 2016 | Reduced viability and self-renewal ability of GSC cultures but not in differentiated GB cells and normal mesenchymal human stem cells                             | [101] |
|                                    | /                   | 2022 | Liposomes: inhibited human GB cell growth in 2D and 3D models                                                                                                     | [102] |
| RGFP109<br>HDAC 1,3                | TMZ                 | 2016 | Overcomes TMZ resistance by blocking NF- $\kappa$ B-dependent transcription in GB cells                                                                           | [103] |

/ = monotherapy. 2DDG = 2-deoxy-d-glucose, 4HPR = 4-BPA = 4-phenylbutyrate; N-(4-hydroxyphenyl) retinamide; AuNP = gold nanoparticles; BBB = Blood-Brain Barrier; BIX01294 = inhibitor of histone methyltransferase G9a; CCNU = lomustine; DSB = Double-stranded DNA break; CSCs = cancer stem cells; DDR = DNA Damage Response; DOX = Doxorubicin; DZNep = inhibitor of lysine methyltransferase EZH2 (3-deazaneplanocin A); GB = glioblastoma; CED = convection enhanced delivery; GEF = Gefinitib; GSC = glioma stem cell; HDAC(i) = Histone deacetylase (inhibitor); HIRT = Heavy ion radiotherapy; JAK/STAT = Janus kinase signal transducer and activator of transcription pathways; JNK = Jun N-terminal kinase; LDH = Lactate dehydrogenase; LW = Lophophora williamsii extract; MAPK = Mitogen-activated protein kinase; MEKi = MAPK/ERK kinase inhibitor (TAK-733 or trametinib); MGMT = O<sup>6</sup> methylguanine DNA methyltransferase; NA = Not applicable; OLA = Olaparib; OS = overall survival; OVT= Oncolytic viral therapy; PAN = Panobinostat; PDX = patient-derived xenograft; PEM = Pembrolizumab; TMZ = Temozolomide; TUB = Tubacin; RT = Radiotherapy; VAN = Vandetanib. \* fusion molecule of an alkylator, bendamustine, and vorinostat; & DNA methylation inhibitor; % = proteasome inhibitor.

## References

1. Eyupoglu, I.Y.; Hahnen, E.; Buslei, R.; Siebzehnubl, F.A.; Savaskan, N.E.; Luders, M.; Trankle, C.; Wick, W.; Weller, M.; Fahlbusch, R.; et al. Suberoylanilide hydroxamic acid (SAHA) has potent anti-glioma properties in vitro, ex vivo and in vivo. *J Neurochem* **2005**, *93*, 992-999, doi:10.1111/j.1471-4159.2005.03098.x.
2. Ugur, H.C.; Ramakrishna, N.; Bello, L.; Menon, L.G.; Kim, S.K.; Black, P.M.; Carroll, R.S. Continuous intracranial administration of suberoylanilide hydroxamic acid (SAHA) inhibits tumor growth in an orthotopic glioma model. *J Neurooncol* **2007**, *83*, 267-275, doi:10.1007/s11060-007-9337-z.
3. Yin, D.; Ong, J.M.; Hu, J.; Desmond, J.C.; Kawamata, N.; Konda, B.M.; Black, K.L.; Koeffler, H.P. Suberoylanilide hydroxamic acid, a histone deacetylase inhibitor: effects on gene expression and growth of glioma cells in vitro and in vivo. *Clin Cancer Res* **2007**, *13*, 1045-1052, doi:10.1158/1078-0432.CCR-06-1261.
4. Jane, E.P.; Premkumar, D.R.; Addo-Yobo, S.O.; Pollack, I.F. Abrogation of mitogen-activated protein kinase and Akt signaling by vandetanib synergistically potentiates histone deacetylase inhibitor-induced apoptosis in human glioma cells. *J Pharmacol Exp Ther* **2009**, *331*, 327-337, doi:10.1124/jpet.109.155705.
5. An, Z.; Gluck, C.B.; Choy, M.L.; Kaufman, L.J. Suberoylanilide hydroxamic acid limits migration and invasion of glioma cells in two and three dimensional culture. *Cancer Lett* **2010**, *292*, 215-227, doi:10.1016/j.canlet.2009.12.006.
6. Orzan, F.; Pellegatta, S.; Poliani, P.L.; Pisati, F.; Caldera, V.; Menghi, F.; Kapetis, D.; Marras, C.; Schiffer, D.; Finocchiaro, G. Enhancer of Zeste 2 (EZH2) is up-regulated in malignant gliomas and in glioma stem-like cells. *Neuropathol Appl Neurobiol* **2011**, *37*, 381-394, doi:10.1111/j.1365-2990.2010.01132.x.
7. Xu, J.; Sampath, D.; Lang, F.F.; Prabhu, S.; Rao, G.; Fuller, G.N.; Liu, Y.; Puduvalli, V.K. Vorinostat modulates cell cycle regulatory proteins in glioma cells and human glioma slice cultures. *J Neurooncol* **2011**, *105*, 241-251, doi:10.1007/s11060-011-0604-7.
8. Singh, M.M.; Manton, C.A.; Bhat, K.P.; Tsai, W.W.; Aldape, K.; Barton, M.C.; Chandra, J. Inhibition of LSD1 sensitizes glioblastoma cells to histone deacetylase inhibitors. *Neuro Oncol* **2011**, *13*, 894-903, doi:10.1093/neuonc/nor049.
9. Chiao, M.T.; Cheng, W.Y.; Yang, Y.C.; Shen, C.C.; Ko, J.L. Suberoylanilide hydroxamic acid (SAHA) causes tumor growth slowdown and triggers autophagy in glioblastoma stem cells. *Autophagy* **2013**, *9*, 1509-1526, doi:10.4161/auto.25664.
10. Premkumar, D.R.; Jane, E.P.; Agostino, N.R.; DiDomenico, J.D.; Pollack, I.F. Bortezomib-induced sensitization of malignant human glioma cells to vorinostat-induced apoptosis depends on reactive oxygen species production, mitochondrial dysfunction, Noxa upregulation, Mcl-1 cleavage, and DNA damage. *Mol Carcinog* **2013**, *52*, 118-133, doi:10.1002/mc.21835.
11. Berghauer Pont, L.M.; Spoor, J.K.; Venkatesan, S.; Swagemakers, S.; Kloezeman, J.J.; Dirven, C.M.; van der Spek, P.J.; Lamfers, M.L.; Leenstra, S. The Bcl-2 inhibitor Obatoclax overcomes resistance to histone deacetylase inhibitors SAHA and LBH589 as radiosensitizers in patient-derived glioblastoma stem-like cells. *Genes Cancer* **2014**, *5*, 445-459, doi:10.18632/genesandcancer.42.
12. Cornago, M.; Garcia-Alberich, C.; Blasco-Angulo, N.; Vall-Llaura, N.; Nager, M.; Herreros, J.; Comella, J.X.; Sanchis, D.; Llovera, M. Histone deacetylase inhibitors promote glioma cell death by G2 checkpoint abrogation leading to mitotic catastrophe. *Cell Death Dis* **2014**, *5*, e1435, doi:10.1038/cddis.2014.412.
13. Barazzuol, L.; Jeynes, J.C.; Merchant, M.J.; Wera, A.C.; Barry, M.A.; Kirkby, K.J.; Suzuki, M. Radiosensitization of glioblastoma cells using a histone deacetylase inhibitor (SAHA) comparing carbon ions with X-rays. *Int J Radiat Biol* **2015**, *91*, 90-98, doi:10.3109/09553002.2014.946111.
14. Pont, L.M.; Naipal, K.; Kloezeman, J.J.; Venkatesan, S.; van den Bent, M.; van Gent, D.C.; Dirven, C.M.; Kanaar, R.; Lamfers, M.L.; Leenstra, S. DNA damage response and anti-apoptotic proteins predict radiosensitization efficacy of HDAC inhibitors SAHA and LBH589 in patient-derived glioblastoma cells. *Cancer Lett* **2015**, *356*, 525-535, doi:10.1016/j.canlet.2014.09.049.
15. Rasmussen, R.D.; Gajjar, M.K.; Jensen, K.E.; Hamerlik, P. Enhanced efficacy of combined HDAC and PARP targeting in glioblastoma. *Mol Oncol* **2016**, *10*, 751-763, doi:10.1016/j.molonc.2015.12.014.
16. Zhang, C.; Yang, C.; Feldman, M.J.; Wang, H.; Pang, Y.; Maggio, D.M.; Zhu, D.; Nesvick, C.L.; Dmitriev, P.; Bullova, P.; et al. Vorinostat suppresses hypoxia signaling by modulating nuclear translocation of hypoxia inducible factor 1 alpha. *Oncotarget* **2017**, *8*, 56110-56125, doi:10.18632/oncotarget.18125.
17. Lohitesh, K.; Saini, H.; Srivastava, A.; Mukherjee, S.; Roy, A.; Chowdhury, R. Autophagy inhibition potentiates SAHA-mediated apoptosis in glioblastoma cells by accumulation of damaged mitochondria. *Oncol Rep* **2018**, *39*, 2787-2796, doi:10.3892/or.2018.6373.
18. Gonçalves, R.M.; Agnes, J.P.; Delgobo, M.; de Souza, P.O.; Thomé, M.P.; Heimfarth, L.; Lenz, G.; Moreira, J.C.F.; Zanotto-Filho, A. Late autophagy inhibitor chloroquine improves efficacy of the histone

- deacetylase inhibitor SAHA and temozolomide in gliomas. *Biochem Pharmacol* **2019**, *163*, 440-450, doi:10.1016/j.bcp.2019.03.015.
19. Pastorino, O.; Gentile, M.T.; Mancini, A.; Del Gaudio, N.; Di Costanzo, A.; Bajetto, A.; Franco, P.; Altucci, L.; Florio, T.; Stoppelli, M.P.; et al. Histone Deacetylase Inhibitors Impair Vasculogenic Mimicry from Glioblastoma Cells. *Cancers* **2019**, *11*, 747, doi:10.3390/cancers11060747.
  20. Khathayer, F.; Taylor, M.A.; Ray, S.K. Synergism of 4HPR and SAHA increases anti-tumor actions in glioblastoma cells. *Apoptosis* **2020**, *25*, 217-232, doi:10.1007/s10495-020-01590-9.
  21. Perez, T.; Bergès, R.; Maccario, H.; Oddoux, S.; Honoré, S. Low concentrations of vorinostat decrease EB1 expression in GBM cells and affect microtubule dynamics, cell survival and migration. *Oncotarget* **2021**, *12*, 304-315, doi:10.18632/oncotarget.27892.
  22. Rampazzo, E.; Manfreda, L.; Bresolin, S.; Cani, A.; Mariotto, E.; Bortolozzi, R.; Della Puppa, A.; Viola, G.; Persano, L. Histone Deacetylase Inhibitors Impair Glioblastoma Cell Motility and Proliferation. *Cancers* **2022**, *14*, 1897, doi:10.3390/cancers14081897.
  23. Qiu, Y.; Li, Z.; Copland, J.A.; Mehrling, T.; Tun, H.W. Combined alkylation and histone deacetylase inhibition with EDO-S101 has significant therapeutic activity against brain tumors in preclinical models. *Oncotarget* **2018**, *9*, 28155-28164, doi:10.18632/oncotarget.25588.
  24. Sawa, H.; Murakami, H.; Kumagai, M.; Nakasato, M.; Yamauchi, S.; Matsuyama, N.; Tamura, Y.; Satone, A.; Ide, W.; Hashimoto, I.; et al. Histone deacetylase inhibitor, FK228, induces apoptosis and suppresses cell proliferation of human glioblastoma cells in vitro and in vivo. *Acta Neuropathol* **2004**, *107*, 523-531, doi:10.1007/s00401-004-0841-3.
  25. Nguyen, T.T.T.; Zhang, Y.; Shang, E.; Shu, C.; Quinzii, C.M.; Westhoff, M.A.; Karpel-Massler, G.; Siegelin, M.D. Inhibition of HDAC1/2 Along with TRAP1 Causes Synthetic Lethality in Glioblastoma Model Systems. *Cells* **2020**, *9*, 1661, doi:10.3390/cells9071661.
  26. Nguyen, T.T.T.; Shang, E.; Schiffgens, S.; Torrini, C.; Shu, C.; Akman, H.O.; Prabhu, V.V.; Allen, J.E.; Westhoff, M.A.; Karpel-Massler, G.; et al. Induction of Synthetic Lethality by Activation of Mitochondrial ClpP and Inhibition of HDAC1/2 in Glioblastoma. *Clin Cancer Res* **2022**, *28*, 1881-1895, doi:10.1158/1078-0432.ccr-21-2857.
  27. Kusaczuk, M.; Kretowski, R.; Stypulkowska, A.; Cechowska-Pasko, M. Molecular and cellular effects of a novel hydroxamate-based HDAC inhibitor - belinostat - in glioblastoma cell lines: a preliminary report. *Invest New Drugs* **2016**, *34*, 552-564, doi:10.1007/s10637-016-0372-5.
  28. Gurbani, S.S.; Yoon, Y.; Weinberg, B.D.; Salgado, E.; Press, R.H.; Cordova, J.S.; Ramesh, K.K.; Liang, Z.; Velazquez Vega, J.; Voloschin, A.; et al. Assessing Treatment Response of Glioblastoma to an HDAC Inhibitor Using Whole-Brain Spectroscopic MRI. *Tomography* **2019**, *5*, 53-60, doi:10.18383/j.tom.2018.00031.
  29. Yu, C.; Friday, B.B.; Yang, L.; Atadja, P.; Wigle, D.; Sarkaria, J.; Adjei, A.A. Mitochondrial Bax translocation partially mediates synergistic cytotoxicity between histone deacetylase inhibitors and proteasome inhibitors in glioma cells. *Neuro-oncol* **2008**, *10*, 309-319, doi:10.1215/15228517-2007-063.
  30. Berghauer Pont, L.M.; Kleijn, A.; Kloezeman, J.J.; van den Bossche, W.; Kaufmann, J.K.; de Vrij, J.; Leenstra, S.; Dirven, C.M.; Lamfers, M.L. The HDAC Inhibitors Scriptaid and LBH589 Combined with the Oncolytic Virus Delta24-RGD Exert Enhanced Anti-Tumor Efficacy in Patient-Derived Glioblastoma Cells. *PLoS One* **2015**, *10*, e0127058, doi:10.1371/journal.pone.0127058.
  31. Singleton, W.G.; Collins, A.M.; Bienemann, A.S.; Killick-Cole, C.L.; Haynes, H.R.; Asby, D.J.; Butts, C.P.; Wyatt, M.J.; Barua, N.U.; Gill, S.S. Convection enhanced delivery of panobinostat (LBH589)-loaded pluronic nano-micelles prolongs survival in the F98 rat glioma model. *Int J Nanomedicine* **2017**, *12*, 1385-1399, doi:10.2147/ijn.s125300.
  32. Yao, Z.G.; Li, W.H.; Hua, F.; Cheng, H.X.; Zhao, M.Q.; Sun, X.C.; Qin, Y.J.; Li, J.M. LBH589 Inhibits Glioblastoma Growth and Angiogenesis Through Suppression of HIF-1 $\alpha$  Expression. *J Neuropathol Exp Neurol* **2017**, *76*, 1000-1007, doi:10.1093/jnen/nlx088.
  33. Meng, W.; Wang, B.; Mao, W.; Wang, J.; Zhao, Y.; Li, Q.; Zhang, C.; Tang, Y.; Ma, J. Enhanced efficacy of histone deacetylase inhibitor combined with bromodomain inhibitor in glioblastoma. *J Exp Clin Cancer Res* **2018**, *37*, 241, doi:10.1186/s13046-018-0916-y.
  34. Zhang, Y.; Ishida, C.T.; Ishida, W.; Lo, S.L.; Zhao, J.; Shu, C.; Bianchetti, E.; Kleiner, G.; Sanchez-Quintero, M.J.; Quinzii, C.M.; et al. Combined HDAC and Bromodomain Protein Inhibition Reprograms Tumor Cell Metabolism and Elicits Synthetic Lethality in Glioblastoma. *Clin Cancer Res* **2018**, *24*, 3941-3954, doi:10.1158/1078-0432.ccr-18-0260.
  35. Meng, W.; Wang, B.; Mao, W.; Wang, J.; Zhao, Y.; Li, Q.; Zhang, C.; Ma, J. Enhanced efficacy of histone deacetylase inhibitor panobinostat combined with dual PI3K/mTOR inhibitor BEZ235 against glioblastoma. *Nagoya J Med Sci* **2019**, *81*, 93-102, doi:10.18999/nagjms.81.1.93.

36. Nguyen, T.T.T.; Zhang, Y.; Shang, E.; Shu, C.; Torrini, C.; Zhao, J.; Bianchetti, E.; Mela, A.; Humala, N.; Mahajan, A.; et al. HDAC inhibitors elicit metabolic reprogramming by targeting super-enhancers in glioblastoma models. *J Clin Invest* **2020**, *130*, 3699-3716, doi:10.1172/jci129049.
37. De La Rosa, J.; Urdiciain, A.; Zazpe, I.; Zelaya, M.V.; Meléndez, B.; Rey, J.A.; Idoate, M.A.; Castresana, J.S. The synergistic effect of DZ-NEP, panobinostat and temozolomide reduces clonogenicity and induces apoptosis in glioblastoma cells. *Int J Oncol* **2020**, *56*, 283-300, doi:10.3892/ijo.2019.4905.
38. De La Rosa, J.; Urdiciain, A.; Zelaya, M.V.; Zazpe, I.; Meléndez, B.; Rey, J.A.; Idoate, M.A.; Castresana, J.S. APR-246 combined with 3-deazaneplanocin A, panobinostat or temozolomide reduces clonogenicity and induces apoptosis in glioblastoma cells. *Int J Oncol* **2021**, *58*, 312-330, doi:10.3892/ijo.2021.5177.
39. Franco-Molina, M.A.; Santana-Krímskaya, S.E.; Madrigal-de-León, L.M.; Coronado-Cerda, E.E.; Zárate-Triviño, D.G.; Hernández-Martínez, S.P.; García-Coronado, P.L.; Rodríguez-Padilla, C. Evaluation of the cytotoxic and immunogenic potential of temozolamide, panobinostat, and *Lophophora williamsii* extract against C6 glioma cells. *Excli j* **2021**, *20*, 614-624, doi:10.17179/excli2020-3181.
40. Pratap, U.P.; Sareddy, G.R.; Liu, Z.; Venkata, P.P.; Liu, J.; Tang, W.; Altwegg, K.A.; Ebrahimi, B.; Li, X.; Tekmal, R.R.; et al. Histone deacetylase inhibitors enhance estrogen receptor beta expression and augment agonist-mediated tumor suppression in glioblastoma. *Neurooncol Adv* **2021**, *3*, vdab099, doi:10.1093/nojnl/vdab099.
41. Bacon, C.L.; O'Driscoll, E.; Regan, C.M. Valproic acid suppresses G1 phase-dependent sialylation of a 65 kDa glycoprotein in the C6 glioma cell cycle. *Int J Dev Neurosci* **1998**, *15*, 777-784, doi:10.1016/s0736-5748(97)00019-1.
42. Knupfer, M.M.; Hernaiz-Driever, P.; Poppenborg, H.; Wolff, J.E.; Cinatl, J. Valproic acid inhibits proliferation and changes expression of CD44 and CD56 of malignant glioma cells in vitro. *Anticancer Res* **1998**, *18*, 3585-3589.
43. Camphausen, K.; Cerna, D.; Scott, T.; Sproull, M.; Burgan, W.E.; Cerra, M.A.; Fine, H.; Tofilon, P.J. Enhancement of in vitro and in vivo tumor cell radiosensitivity by valproic acid. *Int J Cancer* **2005**, *114*, 380-386, doi:10.1002/ijc.20774.
44. Chavez-Blanco, A.; Perez-Plasencia, C.; Perez-Cardenas, E.; Carrasco-Legleu, C.; Rangel-Lopez, E.; Segura-Pacheco, B.; Taja-Chayeb, L.; Trejo-Becerril, C.; Gonzalez-Fierro, A.; Candelaria, M.; et al. Antineoplastic effects of the DNA methylation inhibitor hydralazine and the histone deacetylase inhibitor valproic acid in cancer cell lines. *Cancer cell international* **2006**, *6*, 2, doi:10.1186/1475-2867-6-2.
45. Das, C.M.; Aguilera, D.; Vasquez, H.; Prasad, P.; Zhang, M.; Wolff, J.E.; Gopalakrishnan, V. Valproic acid induces p21 and topoisomerase-II (alpha/beta) expression and synergistically enhances etoposide cytotoxicity in human glioblastoma cell lines. *J Neurooncol* **2007**, *85*, 159-170, doi:10.1007/s11060-007-9402-7.
46. Papi, A.; Ferreri, A.M.; Rocchi, P.; Guerra, F.; Orlandi, M. Epigenetic Modifiers as Anticancer Drugs: Effectiveness of Valproic Acid in Neural Crest-derived Tumor Cells. *Anticancer Res* **2010**, *30*, 535-540.
47. Alvarez, A.A.; Field, M.; Bushnev, S.; Longo, M.S.; Sugaya, K. The effects of histone deacetylase inhibitors on glioblastoma-derived stem cells. *J Mol Neurosci* **2015**, *55*, 7-20, doi:10.1007/s12031-014-0329-0.
48. Zhang, C.; Liu, S.; Yuan, X.; Hu, Z.; Li, H.; Wu, M.; Yuan, J.; Zhao, Z.; Su, J.; Wang, X.; et al. Valproic Acid Promotes Human Glioma U87 Cells Apoptosis and Inhibits Glycogen Synthase Kinase-3 $\beta$  Through ERK/Akt Signaling. *Cell Physiol Biochem* **2016**, *39*, 2173-2185, doi:10.1159/000447912.
49. Chang, Y.L.; Huang, L.C.; Chen, Y.C.; Wang, Y.W.; Hueng, D.Y.; Huang, S.M. The synergistic effects of valproic acid and fluvastatin on apoptosis induction in glioblastoma multiforme cell lines. *Int J Biochem Cell Biol* **2017**, *92*, 155-163, doi:10.1016/j.biocel.2017.10.003.
50. Tseng, J.H.; Chen, C.Y.; Chen, P.C.; Hsiao, S.H.; Fan, C.C.; Liang, Y.C.; Chen, C.P. Valproic acid inhibits glioblastoma multiforme cell growth via paraoxonase 2 expression. *Oncotarget* **2017**, *8*, 14666-14679, doi:10.18632/oncotarget.14716.
51. Garcia, C.G.; Kahn, S.A.; Geraldo, L.H.M.; Romano, I.; Domith, I.; Silva, D.; Dos Santos Assunção, F.; Ferreira, M.J.; Portugal, C.C.; de Souza, J.M.; et al. Combination Therapy with Sulfasalazine and Valproic Acid Promotes Human Glioblastoma Cell Death Through Imbalance of the Intracellular Oxidative Response. *Mol Neurobiol* **2018**, *55*, 6816-6833, doi:10.1007/s12035-018-0895-1.
52. Riva, G.; Cilibrasi, C.; Bazzoni, R.; Cadamuro, M.; Negroni, C.; Butta, V.; Strazzabosco, M.; Dalprà, L.; Lavitrano, M.; Bentivegna, A. Valproic Acid Inhibits Proliferation and Reduces Invasiveness in Glioma Stem Cells Through Wnt/ $\beta$  Catenin Signalling Activation. *Genes* **2018**, *9*, 522, doi:10.3390/genes9110522.
53. Chen, J.C.; Lee, I.N.; Huang, C.; Wu, Y.P.; Chung, C.Y.; Lee, M.H.; Lin, M.H.; Yang, J.T. Valproic acid-induced amphiregulin secretion confers resistance to temozolomide treatment in human glioma cells. *BMC Cancer* **2019**, *19*, 756, doi:10.1186/s12885-019-5843-6.

54. Berendsen, S.; Frijlink, E.; Kroonen, J.; Spliet, W.G.M.; van Hecke, W.; Seute, T.; Sniijders, T.J.; Robe, P.A. Effects of valproic acid on histone deacetylase inhibition in vitro and in glioblastoma patient samples. *Neurooncol Adv* **2019**, *1*, vdz025, doi:10.1093/noajnl/vdz025.
55. Sanaei, M.; Kavooosi, F. The effect of valproic acid on intrinsic, extrinsic, and JAK/STAT pathways in neuroblastoma and glioblastoma cell lines. *Res Pharm Sci* **2022**, *17*, 392-409, doi:10.4103/1735-5362.350240.
56. Tarasenko, N.; Chekroun-Setti, H.; Nudelman, A.; Rephaeli, A. Comparison of the anticancer properties of a novel valproic acid prodrug to leading histone deacetylase inhibitors. *J Cell Biochem* **2018**, *119*, 3417-3428, doi:10.1002/jcb.26512.
57. Sawa, H.; Murakami, H.; Ohshima, Y.; Sugino, T.; Nakajyo, T.; Kisanuki, T.; Tamura, Y.; Satone, A.; Ide, W.; Hashimoto, I.; et al. Histone deacetylase inhibitors such as sodium butyrate and trichostatin A induce apoptosis through an increase of the bcl-2-related protein Bad. *Brain Tumor Pathol* **2001**, *18*, 109-114, doi:10.1007/bf02479423.
58. Wetzel, M.; Premkumar, D.R.; Arnold, B.; Pollack, I.F. Effect of trichostatin A, a histone deacetylase inhibitor, on glioma proliferation in vitro by inducing cell cycle arrest and apoptosis. *J Neurosurg* **2005**, *103*, 549-556, doi:10.3171/ped.2005.103.6.0549.
59. Egler, V.; Korur, S.; Faily, M.; Boulay, J.L.; Imber, R.; Lino, M.M.; Merlo, A. Histone deacetylase inhibition and blockade of the glycolytic pathway synergistically induce glioblastoma cell death. *Clin Cancer Res* **2008**, *14*, 3132-3140, doi:10.1158/1078-0432.CCR-07-4182.
60. Svechnikova, I.; Almqvist, P.M.; Ekstrom, T.J. HDAC inhibitors effectively induce cell type-specific differentiation in human glioblastoma cell lines of different origin. *Int J Oncol* **2008**, *32*, 821-827, doi:10.3892/ijo.32.4.821.
61. Gao, J.; Chen, T.; Liu, J.; Liu, W.; Hu, G.; Guo, X.; Yin, B.; Gong, Y.; Zhao, J.; Qiang, B.; et al. Loss of NECL1, a novel tumor suppressor, can be restored in glioma by HDAC inhibitor-Trichostatin A through Sp1 binding site. *Glia* **2009**, *57*, 989-999, doi:10.1002/glia.20823.
62. Foltz, G.; Yoon, J.G.; Lee, H.; Ma, L.; Tian, Q.; Hood, L.; Madan, A. Epigenetic regulation of wnt pathway antagonists in human glioblastoma multiforme. *Genes Cancer* **2010**, *1*, 81-90, doi:10.1177/1947601909356103.
63. Hsu, Y.F.; Sheu, J.R.; Hsiao, G.; Lin, C.H.; Chang, T.H.; Chiu, P.T.; Wang, C.Y.; Hsu, M.J. p53 in trichostatin A induced C6 glioma cell death. *Biochim Biophys Acta* **2011**, *1810*, 504-513, doi:10.1016/j.bbagen.2011.02.006.
64. Horing, E.; Podlech, O.; Silkenstedt, B.; Rota, I.A.; Adamopoulou, E.; Naumann, U. The histone deacetylase inhibitor trichostatin a promotes apoptosis and antitumor immunity in glioblastoma cells. *Anticancer Res* **2013**, *33*, 1351-1360.
65. Sassi Fde, A.; Caesar, L.; Jaeger, M.; Nor, C.; Abujamra, A.L.; Schwartzmann, G.; de Farias, C.B.; Brunetto, A.L.; Lopez, P.L.; Roesler, R. Inhibitory activities of trichostatin a in U87 glioblastoma cells and tumorsphere-derived cells. *J Mol Neurosci* **2014**, *54*, 27-40, doi:10.1007/s12031-014-0241-7.
66. Staberg, M.; Michaelsen, S.R.; Rasmussen, R.D.; Villingshoj, M.; Poulsen, H.S.; Hamerlik, P. Inhibition of histone deacetylases sensitizes glioblastoma cells to lomustine. *Cell Oncol* **2017**, *40*, 21-32, doi:10.1007/s13402-016-0301-9.
67. Alexanian, A.R.; Brannon, A. Unique combinations of epigenetic modifiers synergistically impair the viability of the U87 glioblastoma cell line while exhibiting minor or moderate effects on normal stem cell growth. *Med Oncol* **2022**, *39*, 86, doi:10.1007/s12032-022-01683-2.
68. Camphausen, K.; Burgan, W.; Cerra, M.; Oswald, K.A.; Trepel, J.B.; Lee, M.J.; Tofilon, P.J. Enhanced radiation-induced cell killing and prolongation of gammaH2AX foci expression by the histone deacetylase inhibitor MS-275. *Cancer Res* **2004**, *64*, 316-321, doi:10.1158/0008-5472.can-03-2630.
69. Eyupoglu, I.Y.; Hahnen, E.; Trankle, C.; Savaskan, N.E.; Siebzehnruhl, F.A.; Buslei, R.; Lemke, D.; Wick, W.; Fahlbusch, R.; Blumcke, I. Experimental therapy of malignant gliomas using the inhibitor of histone deacetylase MS-275. *Mol Cancer Ther* **2006**, *5*, 1248-1255, doi:10.1158/1535-7163.MCT-05-0533.
70. Sun, P.; Xia, S.; Lal, B.; Eberhart, C.G.; Quinones-Hinojosa, A.; Maciaczyk, J.; Matsui, W.; Dimeco, F.; Piccirillo, S.M.; Vescovi, A.L.; et al. DNER, an epigenetically modulated gene, regulates glioblastoma-derived neurosphere cell differentiation and tumor propagation. *Stem cells* **2009**, *27*, 1473-1486, doi:10.1002/stem.89.
71. Bangert, A.; Hacker, S.; Cristofanon, S.; Debatin, K.M.; Fulda, S. Chemosensitization of glioblastoma cells by the histone deacetylase inhibitor MS275. *Anticancer Drugs* **2011**, *22*, 494-499, doi:10.1097/CAD.0b013e32834631e0.
72. Essien, E.I.; Hofer, T.P.; Atkinson, M.J.; Anastasov, N. Combining HDAC and MEK Inhibitors with Radiation against Glioblastoma-Derived Spheres. *Cells* **2022**, *11*, 775, doi:10.3390/cells11050775.



73. Buyandelger, B.; Bar, E.E.; Hung, K.S.; Chen, R.M.; Chiang, Y.H.; Liou, J.P.; Huang, H.M.; Wang, J.Y. Histone deacetylase inhibitor MPT0B291 suppresses Glioma Growth in vitro and in vivo partially through acetylation of p53. *Int J Biol Sci* **2020**, *16*, 3184-3199, doi:10.7150/ijbs.45505.
74. Yang, W.B.; Wu, A.C.; Hsu, T.I.; Liou, J.P.; Lo, W.L.; Chang, K.Y.; Chen, P.Y.; Kikkawa, U.; Yang, S.T.; Kao, T.J.; et al. Histone deacetylase 6 acts upstream of DNA damage response activation to support the survival of glioblastoma cells. *Cell Death Dis* **2021**, *12*, 884, doi:10.1038/s41419-021-04182-w.
75. Carol, H.; Gorlick, R.; Kolb, E.A.; Morton, C.L.; Manesh, D.M.; Keir, S.T.; Reynolds, C.P.; Kang, M.H.; Maris, J.M.; Wozniak, A.; et al. Initial testing (stage 1) of the histone deacetylase inhibitor, quisinostat (JNJ-26481585), by the Pediatric Preclinical Testing Program. *Pediatr Blood Cancer* **2014**, *61*, 245-252, doi:10.1002/pbc.24724.
76. Bouché, M.; Dong, Y.C.; Sheikh, S.; Taing, K.; Saxena, D.; Hsu, J.C.; Chen, M.H.; Salinas, R.D.; Song, H.; Burdick, J.A.; et al. Novel Treatment for Glioblastoma Delivered by a Radiation Responsive and Radiopaque Hydrogel. *ACS Biomater Sci Eng* **2021**, *7*, 3209-3220, doi:10.1021/acsbomaterials.1c00385.
77. Choi, S.A.; Kwak, P.A.; Park, C.K.; Wang, K.C.; Phi, J.H.; Lee, J.Y.; Lee, C.S.; Lee, J.H.; Kim, S.K. A novel histone deacetylase inhibitor, CKD5, has potent anti-cancer effects in glioblastoma. *Oncotarget* **2017**, *8*, 9123-9133, doi:10.18632/oncotarget.13265.
78. Zhang, I.; Beus, M.; Stochaj, U.; Le, P.U.; Zorc, B.; Rajic, Z.; Petrecca, K.; Maysinger, D. Inhibition of glioblastoma cell proliferation, invasion, and mechanism of action of a novel hydroxamic acid hybrid molecule. *Cell death discov* **2018**, *4*, 41, doi:10.1038/s41420-018-0103-0.
79. Zhang, W.; Lv, S.; Liu, J.; Zang, Z.; Yin, J.; An, N.; Yang, H.; Song, Y. PCI-24781 down-regulates EZH2 expression and then promotes glioma apoptosis by suppressing the PIK3K/Akt/mTOR pathway. *Genet Mol Biol* **2014**, *37*, 716-724, doi:10.1590/S1415-47572014005000011.
80. Vengoji, R.; Atri, P.; Macha, M.A.; Seshacharyulu, P.; Perumal, N.; Mallya, K.; Liu, Y.; Smith, L.M.; Rachagani, S.; Mahapatra, S.; et al. Differential gene expression-based connectivity mapping identified novel drug candidate and improved Temozolomide efficacy for Glioblastoma. *J Exp Clin Cancer Res* **2021**, *40*, 335, doi:10.1186/s13046-021-02135-x.
81. Asklund, T.; Appelskog, I.B.; Ammerpohl, O.; Ekstrom, T.J.; Almqvist, P.M. Histone deacetylase inhibitor 4-phenylbutyrate modulates glial fibrillary acidic protein and connexin 43 expression, and enhances gap-junction communication, in human glioblastoma cells. *Eur J Cancer* **2004**, *40*, 1073-1081, doi:10.1016/j.ejca.2003.11.034.
82. Marino, A.M.; Sofiadis, A.; Baryawno, N.; Johnsen, J.I.; Larsson, C.; Vukojevic, V.; Ekstrom, T.J. Enhanced effects by 4-phenylbutyrate in combination with RTK inhibitors on proliferation in brain tumor cell models. *Biochem Biophys Res Commun* **2011**, *411*, 208-212, doi:10.1016/j.bbrc.2011.06.141.
83. Kusaczuk, M.; Krętowski, R.; Bartoszewicz, M.; Cechowska-Pasko, M. Phenylbutyrate-a pan-HDAC inhibitor-suppresses proliferation of glioblastoma LN-229 cell line. *Tumour Biol* **2016**, *37*, 931-942, doi:10.1007/s13277-015-3781-8.
84. Engelhard, H.H.; Duncan, H.A.; Kim, S.; Criswell, P.S.; Van Eldik, L. Therapeutic effects of sodium butyrate on glioma cells in vitro and in the rat C6 glioma model. *Neurosurgery* **2001**, *48*, 616-624, doi:10.1097/00006123-200103000-00035.
85. Nakagawa, H.; Sasagawa, S.; Itoh, K. Sodium butyrate induces senescence and inhibits the invasiveness of glioblastoma cells. *Oncol Lett* **2018**, *15*, 1495-1502, doi:10.3892/ol.2017.7518.
86. Taylor, M.A.; Khathayer, F.; Ray, S.K. Quercetin and Sodium Butyrate Synergistically Increase Apoptosis in Rat C6 and Human T98G Glioblastoma Cells Through Inhibition of Autophagy. *Neurochem Res* **2019**, *44*, 1715-1725, doi:10.1007/s11064-019-02802-8.
87. Majchrzak-Celińska, A.; Kleszcz, R.; Stasiłowicz-Krzemień, A.; Cielecka-Piontek, J. Sodium Butyrate Enhances Curcuminoids Permeability through the Blood-Brain Barrier, Restores Wnt/ $\beta$ -Catenin Pathway Antagonists Gene Expression and Reduces the Viability of Glioblastoma Cells. *Int J Mol Sci* **2021**, *22*, 11285, doi:10.3390/ijms222011285.
88. Pająk, B.; Siwiak-Niedbalska, E.; Jaśkiewicz, A.; Sołtyka, M.; Zieliński, R.; Domoradzki, T.; Fokt, I.; Skóra, S.; Priebe, W. Synergistic Anticancer Effect of Glycolysis and Histone Deacetylases Inhibitors in a Glioblastoma Model. *Biomedicines* **2021**, *9*, 1749, doi:10.3390/biomedicines9121749.
89. Zhang, G.; Gan, Y.H. Synergistic antitumor effects of the combined treatment with an HDAC6 inhibitor and a COX-2 inhibitor through activation of PTEN. *Oncol Rep* **2017**, *38*, 2657-2666, doi:10.3892/or.2017.5981.
90. Kim, G.W.; Lee, D.H.; Yeon, S.K.; Jeon, Y.H.; Yoo, J.; Lee, S.W.; Kwon, S.H. Temozolomide-resistant Glioblastoma Depends on HDAC6 Activity Through Regulation of DNA Mismatch Repair. *Anticancer Res* **2019**, *39*, 6731-6741, doi:10.21873/anticancer.13888.

91. Urdiciain, A.; Erausquin, E.; Meléndez, B.; Rey, J.A.; Idoate, M.A.; Castresana, J.S. Tubastatin A, an inhibitor of HDAC6, enhances temozolomide-induced apoptosis and reverses the malignant phenotype of glioblastoma cells. *Int J Oncol* **2019**, *54*, 1797-1808, doi:10.3892/ijo.2019.4739.
92. Auzmendi-Iriarte, J.; Saenz-Antoñanzas, A.; Mikelez-Alonso, I.; Carrasco-Garcia, E.; Tellaetxe-Abete, M.; Lawrie, C.H.; Sampron, N.; Cortajarena, A.L.; Matheu, A. Characterization of a new small-molecule inhibitor of HDAC6 in glioblastoma. *Cell Death Discov* **2020**, *11*, 417, doi:10.1038/s41419-020-2586-x.
93. Yin, C.; Li, P. Growth Suppression of Glioma Cells Using HDAC6 Inhibitor, Tubacin. *Open Med* **2018**, *13*, 221-226, doi:10.1515/med-2018-0034.
94. Li, S.; Liu, X.; Chen, X.; Zhang, L.; Wang, X. Histone deacetylase 6 promotes growth of glioblastoma through inhibition of SMAD2 signaling. *Tumour Biol* **2015**, *36*, 9661-9665, doi:10.1007/s13277-015-3747-x.
95. Huang, Z.; Xia, Y.; Hu, K.; Zeng, S.; Wu, L.; Liu, S.; Zhi, C.; Lai, M.; Chen, D.; Xie, L.; et al. Histone deacetylase 6 promotes growth of glioblastoma through the MKK7/JNK/c-Jun signaling pathway. *J Neurochem* **2020**, *152*, 221-234, doi:10.1111/jnc.14849.
96. Liffers, K.; Kolbe, K.; Westphal, M.; Lamszus, K.; Schulte, A. Histone Deacetylase Inhibitors Resensitize EGFR/EGFRvIII-Overexpressing, Erlotinib-Resistant Glioblastoma Cells to Tyrosine Kinase Inhibition. *Target Oncol* **2016**, *11*, 29-40, doi:10.1007/s11523-015-0372-y.
97. Was, H.; Krol, S.K.; Rotili, D.; Mai, A.; Wojtas, B.; Kaminska, B.; Maleszewska, M. Histone deacetylase inhibitors exert anti-tumor effects on human adherent and stem-like glioma cells. *Clin Epigenetics* **2019**, *11*, 11, doi:10.1186/s13148-018-0598-5.
98. Sharma, V.; Koul, N.; Joseph, C.; Dixit, D.; Ghosh, S.; Sen, E. HDAC inhibitor, scriptaid, induces glioma cell apoptosis through JNK activation and inhibits telomerase activity. *J Cell Mol Med* **2010**, *14*, 2151-2161, doi:10.1111/j.1582-4934.2009.00844.x.
99. Balasubramanian, S.; Ramos, J.; Luo, W.; Sirisawad, M.; Verner, E.; Buggy, J.J. A novel histone deacetylase 8 (HDAC8)-specific inhibitor PCI-34051 induces apoptosis in T-cell lymphomas. *Leukemia* **2008**, *22*, 1026-1034, doi:10.1038/leu.2008.9.
100. Marampon, F.; Leoni, F.; Mancini, A.; Pietrantonì, I.; Codenotti, S.; Ferella, L.; Megiorni, F.; Porro, G.; Galbiati, E.; Pozzi, P.; et al. Histone deacetylase inhibitor ITF2357 (givinostat) reverts transformed phenotype and counteracts stemness in in vitro and in vivo models of human glioblastoma. *J Cancer Res Clin Oncol* **2019**, *145*, 393-409, doi:10.1007/s00432-018-2800-8.
101. Angeletti, F.; Fossati, G.; Pattarozzi, A.; Wurth, R.; Solari, A.; Daga, A.; Masiello, I.; Barbieri, F.; Florio, T.; Comincini, S. Inhibition of the Autophagy Pathway Synergistically Potentiates the Cytotoxic Activity of Givinostat (ITF2357) on Human Glioblastoma Cancer Stem Cells. *Front Mol Neurosci* **2016**, *9*, 107, doi:10.3389/fnmol.2016.00107.
102. Taiarol, L.; Bigogno, C.; Sesana, S.; Kravicz, M.; Viale, F.; Pozzi, E.; Monza, L.; Carozzi, V.A.; Meregalli, C.; Valtorta, S.; et al. Givinostat-Liposomes: Anti-Tumor Effect on 2D and 3D Glioblastoma Models and Pharmacokinetics. *Cancers* **2022**, *14*, 2978, doi:10.3390/cancers14122978.
103. Li, Z.Y.; Li, Q.Z.; Chen, L.; Chen, B.D.; Wang, B.; Zhang, X.J.; Li, W.P. Histone Deacetylase Inhibitor RGFP109 Overcomes Temozolomide Resistance by Blocking NF-κB-Dependent Transcription in Glioblastoma Cell Lines. *Neurochem Res* **2016**, *41*, 3192-3205, doi:10.1007/s11064-016-2043-5.
